# Supplementary material for: Edible Flowers Used in Some Countries of the Mediterranean Basin: An Ethnobotanical Overview
Source: MDPI journal article supplement (doi:10.3390/plants11233272), 2022-11-28
Supplement: s1 [file s1]

**Table S1** Vernacular names of the traditionally edible flowers used in the Mediterranean basin. (Al= Albany; Bo-He= Bos-nia-Herzegovina; Cr= Croatia; Gr.= Greek; Is=Israel; It= Italy; Le=Lebanon; Mo=Morocco; Pa= Palestine; Sp= Spain; Tn= Tunisia; Tu= Turkey.)

| Species                                                                                  | Vernacular names                                                                                                                                                                   |
|------------------------------------------------------------------------------------------|------------------------------------------------------------------------------------------------------------------------------------------------------------------------------------|
| <i>Acanthus hirsutus</i> Boiss.                                                          | Öküz osurtan (Tu)                                                                                                                                                                  |
| <i>Achillea collina</i> (Becker ex Rchb.f.) Heimerl                                      | Millefoje, stagnasangue (It)                                                                                                                                                       |
| <i>Achillea millefolium</i> L.                                                           | Hajdučka trava, Stolisnjak, Sporiš (Bo-He); Erba besa, Millefoglie, Moufette, Fleur blanc, Tanéda mata, Tanédón, Livia mata, Milafior, Livia di préi, Carèdiverm, Danéda mata (It) |
| <i>Achillea moschata</i> Wulfen                                                          | Livia, Tanéda, Danéda (It)                                                                                                                                                         |
| <i>Achillea nana</i> L.                                                                  | Tanéda, Tanéda mata, Tanéda bas, Livia di ges (It)                                                                                                                                 |
| <i>Acinos alpinus</i> (L.) Moench                                                        | Té de sierra, Té del monte (Sp)                                                                                                                                                    |
| <i>Alcea rosea</i> L.                                                                    | N.R.                                                                                                                                                                               |
| <i>Alliaria petiolata</i> (M.Bieb.) Cavara et Grande                                     | N.R.                                                                                                                                                                               |
| <i>Allium ampeloprasum</i> L.                                                            | Ajete, Ajo silvestre, Puerro, Puerro silvestre (Sp)                                                                                                                                |
| <i>Allium baeticum</i> Boiss.                                                            | Korath (Tn)                                                                                                                                                                        |
| <i>Allium neapolitanum</i> Cirillo                                                       | Yazoul, Gazoul, Azoul (Tn)                                                                                                                                                         |
| <i>Allium roseum</i>                                                                     | Korath (Tn)                                                                                                                                                                        |
| <i>Anagyris foetida</i> L.                                                               | Fasolu taddi (It)                                                                                                                                                                  |
| <i>Anchusa azurea</i> Miller                                                             | Chupamiel, Alcalcuz (Sp); Mijmejok (Tu)                                                                                                                                            |
| <i>Anchusa undulata</i> L. subsp. <i>hybrida</i> (Ten.) Coutinho                         | N.R.                                                                                                                                                                               |
| <i>Anchusa italica</i> Retz.                                                             | Alkanet (Al)                                                                                                                                                                       |
| <i>Anchusa strigosa</i> Banks & Sol.                                                     | Himhum, Gûrîz (Tu)                                                                                                                                                                 |
| <i>Anethum graveolens</i> L.                                                             | Aneto (It)                                                                                                                                                                         |
| <i>Antennaria dioica</i> (L.) Gaertn.                                                    | N.R.                                                                                                                                                                               |
| <i>Anthriscus nemorosa</i> (M.Bieb.) Sprengel                                            | Xitok (Tu)                                                                                                                                                                         |
| <i>Aphyllanthes monspeliensis</i> L.                                                     | Llonses (Sp)                                                                                                                                                                       |
| <i>Aquilegia vulgaris</i> L.                                                             | Kukufraka (Sp)                                                                                                                                                                     |
| <i>Arctium lappa</i> L.                                                                  | Nápula, Nápol, Moros, Berdèna, Grignapola (It)                                                                                                                                     |
| <i>Artemisia absinthium</i> L.                                                           | Pelin (Bo-He); Axenxo, Donzell (Sp)                                                                                                                                                |
| <i>Artemisia alba</i> Turra                                                              | Canforedda (It)                                                                                                                                                                    |
| <i>Artemisia genipi</i> Stechm.                                                          | Genepi, Genepi giallo, Genepi maschi, Gënëpi fumél (It)                                                                                                                            |
| <i>Artemisia glacialis</i> L.                                                            | Genepi fumelo, Bava dei ghiacciai (It)                                                                                                                                             |
| <i>Artemisia umbelliformis</i> subsp. <i>eriantha</i> (Ten.) Vallès-Xirau & Oliva Brañas | Genepi (It)                                                                                                                                                                        |
| <i>Artemisia vulgaris</i> L.                                                             | N.R.                                                                                                                                                                               |
| <i>Asparagus stipularis</i> Forssk.                                                      | N.R.                                                                                                                                                                               |
| <i>Asphodelus albus</i> Mill. subsp. <i>subalpinus</i> Nyman                             | N.R.                                                                                                                                                                               |

|                                                                                      |                                                                                                                                                                                                                                                                                                        |
|--------------------------------------------------------------------------------------|--------------------------------------------------------------------------------------------------------------------------------------------------------------------------------------------------------------------------------------------------------------------------------------------------------|
| <i>Asphodelus ramosus</i> L. subsp. <i>ramosus</i>                                   | Asfodelo, Porraccio, Purrazzu, Arvùzzi ramùsi (It)                                                                                                                                                                                                                                                     |
| <i>Bellardia trixago</i> (L.) All.                                                   | Torta de pastor (Sp)                                                                                                                                                                                                                                                                                   |
| <i>Bellis</i> spp. ( <i>B. annua</i> L.; <i>B. perennis</i> L.)                      | Ovčica (Bo-He); Papatya (Tu)                                                                                                                                                                                                                                                                           |
| <i>Berberis vulgaris</i> L.                                                          | Špin d’uġġet, Spin d’asen, Feruda, Crispin (It)                                                                                                                                                                                                                                                        |
| <i>Betula pendula</i> Roth.                                                          | Breza (Bo-He)                                                                                                                                                                                                                                                                                          |
| <i>Bidens aurea</i> Sherff                                                           | Té, Té americano, Té chino, Té castellano, Té de Buenos Aires, Té de huerta, Té de huerto, Té de M’ejico, Té de Canarias, Té moro, Té moruno (Sp)                                                                                                                                                      |
| <i>Borago officinalis</i> L.                                                         | Borratja (Sp); Borracce, Borraccia, Borrachine, Borrascine, Burracce, Burraccedde, Burracelle, Burracchia, Burraccia, Burrascene, Burrasciana, Burrascina, Ferrascene, Murraine, Pezze De Iarde, Sucamele, Suzzamele, Verrascene, Verrascene , Vorraina, Vorraine, Vurraina, Vurraine, Vurrascene (It) |
| <i>Brassica fruticulosa</i> Cirillo                                                  | Caulicèddu, Qualicèddu (It)                                                                                                                                                                                                                                                                            |
| <i>Brassica incana</i> Ten.                                                          | Amarèddi (It)                                                                                                                                                                                                                                                                                          |
| <i>Brassica rupestris</i> Raf. subsp. <i>rupestris</i>                               | Cavulazzu, Càulu di rocca (It)                                                                                                                                                                                                                                                                         |
| <i>Calendula officinalis</i> L., <i>C. arvensis</i> L.                               | Neven (Bo-He); Calendula, Calennula, Kalendula (It)                                                                                                                                                                                                                                                    |
| <i>Calligonum comosum</i> L’Her.                                                     | N.R.                                                                                                                                                                                                                                                                                                   |
| <i>Calluna vulgaris</i> (L.) Hull.                                                   | Vris (Bo-He)                                                                                                                                                                                                                                                                                           |
| <i>Caltha palustris</i> L.                                                           | Kaljužnica (Bo-He)                                                                                                                                                                                                                                                                                     |
| <i>Capparis orientalis</i> Veill, <i>C. spinosa</i> L. [incl. <i>C. ovata</i> Desf.] | Kapar (Bo-He); Kapare (Cr); Capperò, Chiapparù, Chiapperi, Chiapparedda (It); Kabbar (Tn); Gebere, Dikenli gebere (Tu)                                                                                                                                                                                 |
| <i>Capsella bursa-pastoris</i> (L.) Medik                                            | Devanaeras, Chorrontelas (Sp)                                                                                                                                                                                                                                                                          |
| <i>Carduus argyrea</i> Viv.                                                          | Napodi d’acqua, Napordio (It)                                                                                                                                                                                                                                                                          |
| <i>Carduus corymbosus</i> Ten.                                                       | Carvi (It)                                                                                                                                                                                                                                                                                             |
| <i>Carduus nutans</i> L. subsp. <i>nutans</i>                                        | N.R.                                                                                                                                                                                                                                                                                                   |
| <i>Carlina acanthifolia</i> All.                                                     | Cardéla, Carlina (It)                                                                                                                                                                                                                                                                                  |
| <i>Carlina acaulis</i> L.                                                            | Carlina, Garzun, Cardan, Cardòn, Cardon plàt, Chardouso, Spinus (It)                                                                                                                                                                                                                                   |
| <i>Carlina corymbosa</i> L.                                                          | Mazzacani (It)                                                                                                                                                                                                                                                                                         |
| <i>Carlina gummiifera</i> (L.) Less.                                                 | Masticògna, Masticògna, Cacucciulidda (It)                                                                                                                                                                                                                                                             |
| <i>Castanea sativa</i> Miller                                                        | Castagna, Cjastinis, Kostànj (It)                                                                                                                                                                                                                                                                      |
| <i>Ceratonia siliqua</i> L.                                                          | Carruba, Carrobie (It)                                                                                                                                                                                                                                                                                 |
| <i>Cercis siliquastrum</i> L. subsp. <i>siliquastrum</i>                             | Koutsipia, Redbud (Gr); Albero di Giuda (It)                                                                                                                                                                                                                                                           |
| <i>Cerinthe major</i> L.                                                             | Sucamele (It)                                                                                                                                                                                                                                                                                          |
| <i>Chiliadenus glutinosus</i> Fourr. [Jasonia glutinosa (L.) DC.]                    | Té de roca, Té de peña, Arnica (Sp)                                                                                                                                                                                                                                                                    |
| <i>Cirsium acaule</i> Scop.                                                          | Vazanel (It)                                                                                                                                                                                                                                                                                           |
| <i>Cirsium spinosissimum</i> (L.) Scop.                                              | Chardouso, Ġardón, Atición dalción, Sc’pín, Cardón de lirozocola (It)                                                                                                                                                                                                                                  |
| <i>Convolvulus arvensis</i> L.                                                       | Campanelle (It); Correhuela (Sp)                                                                                                                                                                                                                                                                       |
| <i>Corylus avellana</i> L.                                                           | Lijeska (Bo-He)                                                                                                                                                                                                                                                                                        |

|                                                                                     |                                                           |
|-------------------------------------------------------------------------------------|-----------------------------------------------------------|
| <i>Corylus colurna</i> L.                                                           | Meija lijeska (Bo-He)                                     |
| <i>Cota altissima</i> (L.) J.Gay [Anthemis altissima L., A. arvensis L.]            | Magarza, gamarza (Sp); Büyük papatya (Tu)                 |
| <i>Cota tinctoria</i> (L.) J.Gay [Anthemis tinctoria L.]                            | N.R.                                                      |
| <i>Cota wiedemanniana</i> (Fisch. & C.A.Mey.) Holub [Anthemis w. Fisch. & C.A.Mey.] | Papatya (Tu)                                              |
| <i>Crataegus monogyna</i> Jacq. subsp. <i>monogyna</i>                              | Bianc de špín, Špín, Biancospín (It)                      |
| <i>Crataegus orientalis</i> M.Bieb. subsp. <i>orientalis</i>                        | Guvij, Heluje, Sez (Tu)                                   |
| <i>Crocus biflorus</i> Miller                                                       | Ciuri pi fari u zafferanu (It)                            |
| <i>Crocus longiflorus</i> Rafin.                                                    | N.R.                                                      |
| <i>Crocus neapolitanus</i> (Ker Gawl.) Loisel.                                      | N.R.                                                      |
| <i>Crocus serotinus</i> Salisb.                                                     | Azafrán (Sp)                                              |
| <i>Crocus vernus</i> (L.) Hill.                                                     | Ćigámola, Cigámbola deldiául, Cigambula, Bucanef (It)     |
| <i>Cucurbita ficifolia</i> Bouche.                                                  | Calabaza, Calabazo, Calabaza de cabello de ángel (Sp)     |
| <i>Cucurbita pepo</i> L. [incl.var. <i>oblonga</i> ]                                | Flor de carabassó (Sp); Kızartmalık kabak (Tu)            |
| <i>Cynara cardunculus</i> L. subsp. <i>cardunculus</i>                              | Cardùn'i spini, Cacòcciuliddu spinusu (It)                |
| <i>Cynara horrida</i> Aiton                                                         | N.R.                                                      |
| <i>Cytinus hypocistis</i> (L.) L.                                                   | Melera, Mamelletes (Sp)                                   |
| <i>Cynara humilis</i> L.                                                            | Timet (Mo)                                                |
| <i>Dianthus seguieri</i> Vill. subsp. <i>requienii</i> (Godr.)                      | Clavells de bosc (Sp)                                     |
| <i>Digitalis purpurea</i> L.                                                        | Sa poddigale (It)                                         |
| <i>Digitalis thapsi</i> L.                                                          | Chupador (Sp)                                             |
| <i>Diplotaxis catholica</i> (L.) DC.                                                | Pan y quesito amarillo (Sp)                               |
| <i>Dryas octopetala</i> L.                                                          | N.R.                                                      |
| <i>Echinophora tenuifolia</i> L.                                                    | N.R.                                                      |
| <i>Echium creticum</i> L.                                                           | Chupamieles (Sp)                                          |
| <i>Echium italicum</i> L.                                                           | Hımhum, Mijok (Tu)                                        |
| <i>Echium plantagineum</i> L.                                                       | Suzzamele (It); Argamula, Chupamieles (Sp)                |
| <i>Echium vulgare</i> L.                                                            | Chupamiel, Bovina (Sp)                                    |
| <i>Elaeagnus angustifolia</i> L.                                                    | Sinç (Tu)                                                 |
| <i>Ferula communis</i> L.                                                           | N.R.                                                      |
| <i>Foeniculum vulgare</i> Miller subsp. <i>vulgare</i>                              | Finocchio selvatico, finocchio cavalli, finocchietto (It) |
| <i>Fragaria vesca</i> L.                                                            | Fragolina, Jaguca (It)                                    |
| <i>Fritillaria lusitanica</i> Wikstr.                                               | Campanicas (Sp)                                           |
| <i>Fritillaria pyrenaica</i> L.                                                     | Jarras (Sp)                                               |
| <i>Fumaria capreolata</i> L. subsp. <i>capreolata</i>                               | Fumàa, Cantagalétti (It)                                  |

|                                                                          |                                                                                          |
|--------------------------------------------------------------------------|------------------------------------------------------------------------------------------|
| <i>Genista tridentata</i> L. [Pterospartum tridentatum (L.) Willk.]      | Carquesa, Carquexa (Sp)                                                                  |
| <i>Gentiana acaulis</i> L.                                               | Genzianella, Gentien, Peirette, Braio d'cucuc, Pirulet (It)                              |
| <i>Gentiana verna</i> L.                                                 | Genzianella, Gentien, Fieur di Corbas (It)                                               |
| <i>Gladiolus byzantinus</i> Mill.                                        | N.R.                                                                                     |
| <i>Gladiolus italicus</i> Miller                                         | N.R.                                                                                     |
| <i>Gundelia tournefortii</i> L.                                          | A'kub (Is)                                                                               |
| <i>Hedysarum coronarium</i> L.                                           | Lupinella, Lupina (It)                                                                   |
| <i>Helichrysum italicum</i> (Roth) G. Don                                | Cmilje, Smilje (Bo-He); Manzanilla silvestre (Sp)                                        |
| <i>Helichrysum stoechas</i> (L.) Moench                                  | Mançanilla borda, Manzanilla (Sp)                                                        |
| <i>Hemodactylus tuberosus</i> (L.) Mill.                                 | N.R.                                                                                     |
| <i>Herniaria glabra</i> L.                                               | Manzanilla del campo (Sp)                                                                |
| <i>Hibiscus trionum</i> L.                                               | Hatmi cicegi (Tu)                                                                        |
| <i>Hirschfeldia incana</i> (L.) Lagr.-Foss.                              | Làssimi, Mazzareddi (It)                                                                 |
| <i>Humulus lupulus</i> L.                                                | Llúpol (Sp)                                                                              |
| <i>Hypericum perforatum</i> L.                                           | Gospina trava (Bo-He); Scacciadiavoli, Erba di S. Giovanni (It); Herba de sant Joan (Sp) |
| <i>Iris persica</i> L.                                                   | Birbîzêk, Birbîzêka mîha, Bîrxîzeylê (Tu)                                                |
| <i>Iris reticulata</i> M. Bieb                                           | Birbîzêk, Birbîzêka bizina, Bîrxîzeylê (Tu)                                              |
| <i>Iris sari</i> Schott ex Baker                                         | Nergiz (Tu)                                                                              |
| <i>Isatis tinctoria</i> L. [incl. subsp. <i>canescens</i> (DC.) Arcang.] | Cavolu carrammu, Guàdu (It)                                                              |
| <i>Jasonia tuberosa</i> (L.) DC.                                         | Té, Té de tierra (Sp)                                                                    |
| <i>Lamium album</i> L.                                                   | Ortíga máta, Ortía máta (It)                                                             |
| <i>Lamium bifidum</i> Cirillo                                            | N.R.                                                                                     |
| <i>Lamium galeobdolon</i> (L.) L.                                        | N.R.                                                                                     |
| <i>Lamium garganicum</i> L. subsp. <i>laevigatum</i> Arcang.             | N.R.                                                                                     |
| <i>Lamium maculatum</i> L.                                               | N.R.                                                                                     |
| <i>Lamium orvala</i> L.                                                  | N.R.                                                                                     |
| <i>Lamium purpureum</i> L.                                               | Emzikotu (Tu)                                                                            |
| <i>Lantana camara</i> L.                                                 | Caputxina (Sp)                                                                           |
| <i>Larix decidua</i> Miller                                              | Láreš, Láraš, Larġá, Larġé (It)                                                          |
| <i>Lathyrus sylvestris</i> L.                                            | Cessavuoi, Fasòla sarvaggia (It)                                                         |
| <i>Lavandula angustifolia</i> L.                                         | Steccadò, Cadò (It); Spígol (Sp)                                                         |
| <i>Lavandula latifolia</i> Medik                                         | Alhucema, Espígol (Sp)                                                                   |
| <i>Lavandula pedunculata</i> L.                                          | Antueso (Sp)                                                                             |
| <i>Lavandula stoechas</i> L.                                             | Spicu, Ispigu (It); Cantueso, Cap díase, Bofarull (Sp)                                   |
| <i>Leontopodium nivale</i> (Ten.) Huet ex Hand.-Mazz                     | Stela alpina (It)                                                                        |
| <i>Leuzea conifera</i> DC.                                               | Cardo santo, Alcachofilla (Sp)                                                           |
| <i>Linaria hirta</i> (L.) Moench                                         | Pan y queso (Sp)                                                                         |
| <i>Lithodora fruticosa</i> (L.) Griseb.                                  | Sietesangrías (Sp)                                                                       |
| <i>Lonicera caerulea</i> L.                                              | N.R.                                                                                     |

|                                                                                                                         |                                                                                                         |
|-------------------------------------------------------------------------------------------------------------------------|---------------------------------------------------------------------------------------------------------|
| <i>Lonicera caprifolium</i> L.                                                                                          | N.R.                                                                                                    |
| <i>Lonicera implexa</i> Aiton                                                                                           | Chupaores (Sp)                                                                                          |
| <i>Lonicera periclymenum</i> L.                                                                                         | Jesu kristoren atzamarra, Jesu kristoren eskue, Jaungoikoan eskue (Sp)                                  |
| <i>Malva neglecta</i> Wallr.                                                                                            | Malva selvadiga (It)                                                                                    |
| <i>Malva sylvestris</i> L.                                                                                              | Crnisljez, Plavisljez, Vuča stopa (Bo-He); Malva (Sp)                                                   |
| <i>Matricaria aurea</i> (Loefl.) Sch.Bip.<br>[ <i>Chamomilla aurea</i> (Loefl.) Gay ex Cossom & Kralik]                 | Babounej (Ly)                                                                                           |
| <i>Matricaria chamomilla</i> L.<br>[ <i>Chamomilla recutita</i> (L.) Rauschert]                                         | Kamomila, Kamilica (Bo-He); Capumilla (It)                                                              |
| <i>Melissa officinalis</i> L.                                                                                           | N.R.                                                                                                    |
| <i>Mentha aquatica</i> L.                                                                                               | Ogul otu (Tu)                                                                                           |
| <i>Mentha gattefossei</i> Maire                                                                                         | Flyou dial jbel (Mo)                                                                                    |
| <i>Micromeria juliana</i> (L.) Benth.                                                                                   | Kekik (Tu)                                                                                              |
| <i>Moltkia coerulea</i> Lehm.                                                                                           | N.R.                                                                                                    |
| <i>Narcissus poëticus</i> L.                                                                                            | Susarelo, Joes de mel, Fior del mel (It)                                                                |
| <i>Narcissus tazetta</i> L. subsp. <i>tazetta</i>                                                                       | Narcisu, Agghi porri (It)                                                                               |
| <i>Nigella arvensis</i> L. subsp. <i>glauca</i> (Boiss.) N.Terracc.                                                     | Çay bitkisi, Verdafar, Gulşilave zer (Tu)                                                               |
| <i>Nigritella rhellicani</i> Teppner & E. Klein [N. <i>nigra</i> (L.) Rchb.]                                            | Moréti, Morétino, Moréto, Man dela madona, Manina dela Madòna, Man del Signór, Vaniglione (It)          |
| <i>Onobrychis humilis</i> (Loefl.) G.López                                                                              | Sangre de dios (Sp)                                                                                     |
| <i>Ononis viscosa</i> L.                                                                                                | Gorromino (Sp)                                                                                          |
| <i>Onosma alborosea</i> Fisch. & C.A.Mey.                                                                               | Hımhım, Mijok (Tu)                                                                                      |
| <i>Onosma roussaei</i> DC.                                                                                              | Hımhım, Mijok (Tu)                                                                                      |
| <i>Opuntia ficus indica</i> (L.) Miller [O. <i>maxima</i> Miller]                                                       | Chumbera, Palas (Sp)                                                                                    |
| <i>Papaver rhoeas</i> L.                                                                                                | Amapola, Babaol, Rosella, Ruelles (Sp); Bük, Gelincik, Gelincik, Lale, Ruja, Gül, Nöninka, Laninka (Tu) |
| <i>Pedicularis foliosa</i> L.                                                                                           | N.R.                                                                                                    |
| <i>Pedicularis schizocalyx</i> (Lange) Steininger                                                                       | N.R.                                                                                                    |
| <i>Pentanema salicinum</i> (L.) D.Gut.Larr., Santos-Vicente, Anderb., E.Rico & M.M.Mart.Ort. [Inula <i>salicina</i> L.] | N.R.                                                                                                    |
| <i>Periploca laevigata</i> Aiton                                                                                        | N.R.                                                                                                    |
| <i>Phlomis fruticosa</i> L.                                                                                             | N.R.                                                                                                    |
| <i>Phlomis purpurea</i> L.                                                                                              | Matagallos (Sp)                                                                                         |
| <i>Phlomis russeliana</i> (Sims) Lag. ex Benth.                                                                         | Ari otu (Tu)                                                                                            |
| <i>Pinus pinaster</i> Aiton                                                                                             | Pino rodeno (Sp)                                                                                        |
| <i>Primula acaulis</i> (L.) Hill                                                                                        | Coucù, Fiou ed mortz, Pamparà, Primula (It)                                                             |

|                                                                                                      |                                                                                                                                                                                                                                                                                                                                                                         |
|------------------------------------------------------------------------------------------------------|-------------------------------------------------------------------------------------------------------------------------------------------------------------------------------------------------------------------------------------------------------------------------------------------------------------------------------------------------------------------------|
| <i>Primula elatior</i> (L.) L.                                                                       | N.R.                                                                                                                                                                                                                                                                                                                                                                    |
| <i>Primula veris</i> L.                                                                              | Cuculucia, Primola, Galet, Fior de san giusef, Calet (It); Flor de mayo, Flor de SanJosé, Pámpano (Sp)                                                                                                                                                                                                                                                                  |
| <i>Primula vulgaris</i> Hudson                                                                       | Viole di pane, Fiori di pane, Erba di S. Antonio (It)                                                                                                                                                                                                                                                                                                                   |
| <i>Prunella grandiflora</i> (L.) Scholler                                                            | Herba melera (Sp)                                                                                                                                                                                                                                                                                                                                                       |
| <i>Raphanus raphanistrum</i> L.                                                                      | Jaramago (Sp)                                                                                                                                                                                                                                                                                                                                                           |
| <i>Robinia pseudoacacia</i> L.                                                                       | Bagrem (Bo-He); Kacia, Bagrem (Cr); Acacia, Acasia, Akàcja, Gazhillo (It); Azkazia, Acacia, Pan y quesito, Pan y queso (Sp)                                                                                                                                                                                                                                             |
| <i>Rosa × centifolia</i> L. [R. gallica var. centifolia (L.) Regel]                                  | Vonjača, čentifolia, Ruža (Bo-He)                                                                                                                                                                                                                                                                                                                                       |
| <i>Rosa canina</i> L.                                                                                | Špin de frósola, Rósa salvádia, Špin de anfrósula, Rosa selvadega, Frósola, Frósula (It); Tapaculos, Escaramujo (Sp); Sirgul, Silan (Tu)                                                                                                                                                                                                                                |
| <i>Rosa foetida</i> J. Herrm.                                                                        | Verdasfar, Gulşılave zer (It)                                                                                                                                                                                                                                                                                                                                           |
| <i>Rosa pouzinii</i> Tratt.                                                                          | Escaramujo (Sp)                                                                                                                                                                                                                                                                                                                                                         |
| <i>Rubus ulmifolius</i> Schott                                                                       | Zarza, Zarzamora, Silva, Esbarzer (Sp)                                                                                                                                                                                                                                                                                                                                  |
| <i>Rumex roseus</i> L.                                                                               | Hommitha (Tn)                                                                                                                                                                                                                                                                                                                                                           |
| <i>Ruta graveolens</i> L.                                                                            | Ruta, Grutca (It)                                                                                                                                                                                                                                                                                                                                                       |
| <i>Salvia officinalis</i> L.                                                                         | Kadulja ,Pelín (Bo-He); Adaçavı (Tu)                                                                                                                                                                                                                                                                                                                                    |
| <i>Salvia officinalis</i> L. subsp. <i>lavandulifolia</i> (Vahl) Gam [S. <i>lavandulifolia</i> Vahl] | Salvia, Savia (Sp)                                                                                                                                                                                                                                                                                                                                                      |
| <i>Salvia rosmarinus</i> Schleid. [Rosmarinus officinalis L.]                                        | N.R.                                                                                                                                                                                                                                                                                                                                                                    |
| <i>Salvia sclarea</i> L.                                                                             | Ayı kulağı, Ariotu (Tu)                                                                                                                                                                                                                                                                                                                                                 |
| <i>Salvia tomentosa</i> Miller                                                                       | Adaçai (Tu)                                                                                                                                                                                                                                                                                                                                                             |
| <i>Salvia triloba</i> L. fil.                                                                        | N.R.                                                                                                                                                                                                                                                                                                                                                                    |
| <i>Sambucus nigra</i> L.                                                                             | Bazga, Zoha, Zova (Bo-He); Armul, Sambuco, Bazovina, Paparozzo, Sambúch, Sambúch neir, Sambügu, Sèuc, Confecc, Savuco, Sauco, Pastaccera, Savuci, Savucio, Samuhu (It); Sabuco, Saúco (Sp)                                                                                                                                                                              |
| <i>Sambucus racemosa</i> L.                                                                          | Sambüch salvádik, Sambúch ros, Sambúch mat, Sèuc, Soré (It)                                                                                                                                                                                                                                                                                                             |
| <i>Santolina chamaecyparissus</i> L. s.l.                                                            | Camamilla, Camamirla, Manzanilla, Salvaje (Sp)                                                                                                                                                                                                                                                                                                                          |
| <i>Santolina oblongifolia</i> Boiss.                                                                 | Manzanilla de gredos (Sp)                                                                                                                                                                                                                                                                                                                                               |
| <i>Santolina rosmarinifolia</i> L.                                                                   | Manzanilla blanca (Sp)                                                                                                                                                                                                                                                                                                                                                  |
| <i>Satureja montana</i> L.                                                                           | Vrijesak (Bo-He)                                                                                                                                                                                                                                                                                                                                                        |
| <i>Scolymus hispanicus</i> L.                                                                        | Cardillo (Sp)                                                                                                                                                                                                                                                                                                                                                           |
| <i>Scorzonera undulata</i> Vahl subsp. <i>undulata</i>                                               | Chtel, guiz (Tn)                                                                                                                                                                                                                                                                                                                                                        |
| <i>Scrophularia trifoliata</i> L.                                                                    | N.R.                                                                                                                                                                                                                                                                                                                                                                    |
| <i>Sideritis hyssopifolia</i> L.                                                                     | Té, Té amarillo, Té borriquero, Té de bosc, Té de botja, Té d'espiga, Té de Galba, Té de glera, Té de la peña, Té de lastra, Té de matxo, te de muntanya, Té de monte, Té de pastor, Té de peña, Té de Picos de Europa, Té de Picos, Té de piedra, Té de puerto, Té de roca, t' e de tasca, Té fino, te negre, Té purgante, Té rastrero, Té salvatge, Té verdadero (Sp) |
| <i>Sideritis raeseri</i> Boiss. & Heldr.                                                             | Çaj, Çaj të bardhë, Çaj fushe (Al)                                                                                                                                                                                                                                                                                                                                      |
| <i>Sideritis scardica</i> Griseb.                                                                    | Çaj (Al)                                                                                                                                                                                                                                                                                                                                                                |
| <i>Silybum marianum</i> (L.) Gaertn                                                                  | Cardone (It)                                                                                                                                                                                                                                                                                                                                                            |

|                                                                                  |                                                                                                                                                                                                                 |
|----------------------------------------------------------------------------------|-----------------------------------------------------------------------------------------------------------------------------------------------------------------------------------------------------------------|
| <i>Sinapis alba</i> L. subsp. <i>alba</i>                                        | Làssani, Mazzarèddu (It)                                                                                                                                                                                        |
| <i>Sinapis alba</i> L. subsp. <i>dissecta</i> (Lag.)<br>Bonnier                  | Sinacciòlu di linu (It)                                                                                                                                                                                         |
| <i>Sinapis arvensis</i> L.                                                       | Alàssani, Sinàpa sarvaggia (It)                                                                                                                                                                                 |
| <i>Sisymbrium officinale</i> (L.) Scop.                                          | Làssinu di sceccu, Mazzarèddri (It)                                                                                                                                                                             |
| <i>Spartium junceum</i> L.                                                       | Ginesta (Sp)                                                                                                                                                                                                    |
| <i>Stachys lavandulifolia</i> Vahl.                                              | Çaye qwe, Deme çole (Tu)                                                                                                                                                                                        |
| <i>Syzygium aromaticum</i> (L.) Merr. et<br>Perry                                | Clau (Sp)                                                                                                                                                                                                       |
| <i>Tanacetum parthenium</i> (L.) Sch.<br>Bip.                                    | Matrecara, erba amara (It)                                                                                                                                                                                      |
| <i>Tanacetum vulgare</i> L.                                                      | Tanarides (Sp)                                                                                                                                                                                                  |
| <i>Taraxacum campylodes</i><br>G.E.Haglund                                       | Talla, Talis, Lidrichessa, Modac (It)                                                                                                                                                                           |
| <i>Taraxacum officinale</i> Weber & F.H.<br>Wigg.                                | Divlia radice, maslacac (Cr);Ataciòn, Insalàta di pra', Dent da prà,<br>Dent de can, Amarogghie, Cicuriedde, Cicuriùne, Fogghia resta,<br>Fogghja de fore, Piscialette, Tarassache, Zangone, Zangune restù (It) |
| <i>Teucrium chamaedrys</i> L. subsp.<br><i>sinuatum</i> (Celak.) Rech. f.        | Dubačac (Bo-He)                                                                                                                                                                                                 |
| <i>Teucrium montanum</i> L.                                                      | Ivatrava (Bo-He)                                                                                                                                                                                                |
| <i>Teucrium polium</i> L.                                                        | Ürper (Tu)                                                                                                                                                                                                      |
| <i>Thymbra capitata</i> (L.) Cav. [Th.<br><i>capitatus</i> (L.) Hoffm.]          | Sataredda (It)                                                                                                                                                                                                  |
| <i>Thymus atlanticus</i> (Ball) Roussine                                         | Azukenni (Mo)                                                                                                                                                                                                   |
| <i>Thymus hesperidum</i> Maire                                                   | Azukenni (Mo)                                                                                                                                                                                                   |
| <i>Thymus saturejoides</i> Coss. &<br>Balansa                                    | Azukenni (Mo)                                                                                                                                                                                                   |
| <i>Thymus vulgaris</i> L.                                                        | Zaâtar (Mo)                                                                                                                                                                                                     |
| <i>Thymus zygoides</i> Griseb                                                    | Dag kekik (Tu)                                                                                                                                                                                                  |
| <i>Tilia cordata</i> Mill.                                                       | Sitnolisna lipa (Bo-He); Lipa (Cr); Tiller (Sp)                                                                                                                                                                 |
| <i>Tilia platyphyllos</i> Scop.                                                  | Krupnolisna lipa (Bo-He); Tilo, Tiller (Sp); Ihlamu (Tu)                                                                                                                                                        |
| <i>Tilia tomentosa</i> Moench [Tilia<br><i>argentea</i> Desf. ex DC.]            | Lipa (Cr); Ihlamur (Tu)                                                                                                                                                                                         |
| <i>Tragopogon pratensis</i> L.                                                   | Barba di capra, Barbouch, Barbabouch (It)                                                                                                                                                                       |
| <i>Tragopogon pterocarpus</i> DC.                                                | Yemlik (Tu)                                                                                                                                                                                                     |
| <i>Trifolium alpinum</i> L.                                                      | Trifoglio di montagna, Seutrin, Trioùla, Sanfuèn                                                                                                                                                                |
| <i>Trifolium canescens</i> Willd.                                                | Yonca Otu, Çayırotu (Tu)                                                                                                                                                                                        |
| <i>Trifolium medium</i> L.                                                       | Trefól, Trifogl (It)                                                                                                                                                                                            |
| <i>Trifolium pratense</i> L.                                                     | Sciuada madonna, Suria Pane del latte (It); Chubador, Trébol (Sp);<br>Yonca Otu, Çayırotu (Tu)                                                                                                                  |
| <i>Trifolium repens</i> L.                                                       | Trefól, Trefoil blanc (It)                                                                                                                                                                                      |
| <i>Tripleurospermum parviflorum</i><br>(Wiild.) Pobed                            | Papatya (Tu)                                                                                                                                                                                                    |
| <i>Tropaeolum majus</i> L.                                                       | Ljubidrag, Dragušac (Bo-He)                                                                                                                                                                                     |
| <i>Vachellia farnesiana</i> (L.) Wight &<br>Arn .[ <i>Acacia</i> f. (L.) Wild.]. | N.R.                                                                                                                                                                                                            |
|                                                                                  |                                                                                                                                                                                                                 |

|                                                                    |                                                                       |
|--------------------------------------------------------------------|-----------------------------------------------------------------------|
| <i>Veronica allionii</i> Vill.                                     | Èrbë d'tè, Giaspertere, Té d'mountannho (It)                          |
| <i>Veronica officinalis</i> L.                                     | Èrbë d'tè, Tè svizzero (It)                                           |
| <i>Vicia villosa</i> Roth                                          | Pane e casu (It)                                                      |
| <i>Viola alba</i> Besser s.l.                                      | Bijela ljubiica, Bijela djetelina (Bo-He); Violetta (It)              |
| <i>Viola alba</i> Besser subsp. <i>dehnhardtii</i> (Ten.) W.Becker | N.R.                                                                  |
| <i>Viola biflora</i> L.                                            | Dvocvjetna ljubiica (Bo-He)                                           |
| <i>Viola canina</i> L. subsp. <i>canina</i>                        | N.R.                                                                  |
| <i>Viola bertolonii</i> Pio                                        | N.R.                                                                  |
| <i>Viola etrusca</i> Erben                                         | N.R.                                                                  |
| <i>Viola hirta</i> L.                                              | N.R.                                                                  |
| <i>Viola elegantula</i> Schott                                     | Lijepa ljubiica (Bo-He)                                               |
| <i>Viola kitaibeliana</i> Roem. & Schult.                          | Violet (Gr)                                                           |
| <i>Viola odorata</i> L.                                            | Ljubica mirisna (Bo-He); Viola, Violetta (It); Violeta (Sp)           |
| <i>Viola reichenbachiana</i> Jordan ex Boreau                      | Violet (Gr)                                                           |
| <i>Viola tricolor</i> L.                                           | Danino, maouhica (Bo-He); Violette, Viooulètìn, Vioulètto blanco (It) |
| <i>Zygophyllum fabago</i> L.                                       | N.R.                                                                  |
| <i>Zygophyllum gaetulum</i> Emb. & Maire                           | Lâagaya (Mo)                                                          |
| <i>Zygophyllum waterlotii</i> Maire                                | Lâagaya (Mo)                                                          |
